# Supplementary material for: Quantification and risk assessment of pesticides in southern Brazilian air samples using low-volume sampling and rapid ultrasound-assisted extraction
Source: Royal Society of Chemistry journal article supplement (doi:10.1039/d0em00467g), 2021-01-01
Supplement: d0em00467g1.pdf [file d0em00467g1.pdf]

## ELECTRONIC SUPPLEMENTARY INFORMATION

**Table SI-1** Physical and chemical properties of the analyzed pesticides in this work

| Property                                   | Alachlor                                                                          | Atrazine                                                                           | Chlorpyrifos                                                                        | Trifluralin                                                                         |
|--------------------------------------------|-----------------------------------------------------------------------------------|------------------------------------------------------------------------------------|-------------------------------------------------------------------------------------|-------------------------------------------------------------------------------------|
| Molecular structure                        | 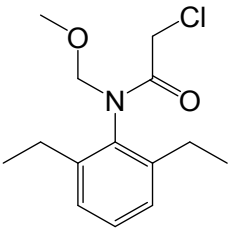 |  |  |  |
| Log K <sub>oa</sub>                        | <sup>57</sup> 9.72                                                                | <sup>57</sup> 8.38                                                                 | <sup>58</sup> 8.32                                                                  | <sup>57</sup> 8.41                                                                  |
| <sup>57</sup> Vapour pressure (mPa)        | 1.0                                                                               | 0.04                                                                               | 2.7                                                                                 | 6.1                                                                                 |
| Solubility in acetone (g L <sup>-1</sup> ) | > 827 (20 °C) <sup>59</sup>                                                       | 31 (25 °C) <sup>60</sup>                                                           | > 1000 (20 °C) <sup>61</sup>                                                        | 250 (20 °C) <sup>62</sup>                                                           |

57 USEPA, CompTox Chem. Dashboard

58 M. Odabasi and B. Cetin, Determination of octanol–air partition coefficients of organochlorine pesticides (OCPs) as a function of temperature: application to air–soil exchange, *J. Environ. Manage.*, 2012, **113**, 432–439.

59 FAO-UNEP, Rotterdam Convention – Draft Decision Guidance Document Alachlor, 2011

60 WHO-IARC, IARC Monographs on the Evaluation of Carcinogenic Risks to Humans, 1999, vol. 73

61 FAO-UNEP, Chlorpyrifos, 2020

62 IUPAC, PPDB – Pesticide Properties Database, <https://sitem.herts.ac.uk/aeru/iupac/Reports/667.htm>, accessed 16 August 2020

**Table SI-2** External calibration and matrix-matched calibration. Method analytical performance using ultrasound-assisted extraction with acetone at 30 °C for 15 min in 20 µg L<sup>-1</sup>

| Pesticide    | External calibration – Recovery (%) ± RSD       |          |
|--------------|-------------------------------------------------|----------|
|              | 1 cycle                                         | 3 cycles |
| Alachlor     | 66 ± 19                                         | 125 ± 13 |
| Atrazine     | 58 ± 18                                         | 124 ± 15 |
| Chlorpyrifos | 74 ± 19                                         | 150 ± 13 |
| Trifluralin  | 52 ± 21                                         | 122 ± 13 |
| Pesticide    | Matrix-matched calibration – Recovery (%) ± RSD |          |
|              | 1 cycle                                         | 3 cycles |
| Alachlor     | 58 ± 19                                         | 81 ± 13  |
| Atrazine     | 59 ± 20                                         | 84 ± 15  |
| Chlorpyrifos | 58 ± 19                                         | 85 ± 12  |
| Trifluralin  | 53 ± 21                                         | 87 ± 13  |

**Table SI-3** Pesticides outdoor concentrations and frequencies of detection (FD) between February and November 2017 at Arapongas in XAD-2 cartridges

| Month               | <i>XAD-2 cartridges</i>        |                                  |           |                                |                                  |           |                                |                                  |           |
|---------------------|--------------------------------|----------------------------------|-----------|--------------------------------|----------------------------------|-----------|--------------------------------|----------------------------------|-----------|
|                     | Atrazine                       |                                  |           | Chlorpyrifos                   |                                  |           | Trifluralin                    |                                  |           |
|                     | Range<br>(pg m <sup>-3</sup> ) | Average<br>(pg m <sup>-3</sup> ) | FD<br>(%) | Range<br>(pg m <sup>-3</sup> ) | Average<br>(pg m <sup>-3</sup> ) | FD<br>(%) | Range<br>(pg m <sup>-3</sup> ) | Average<br>(pg m <sup>-3</sup> ) | FD<br>(%) |
| Feb/17 (n = 4)      | <LOQ                           | -                                | 25        | <LOQ                           | -                                | 0         | <LOQ-299                       | 299                              | 25        |
| Mar/17 (n = 2)      | 353-884                        | 618                              | 100       | <LOQ                           | -                                | 0         | <LOQ                           | -                                | 0         |
| Apr/17 (n = 2)      | <LOQ-260                       | 260                              | 50        | <LOQ                           | -                                | 50        | <LOQ-404                       | 404                              | 50        |
| May/17 (n = 6)      | <LOQ                           | -                                | 17        | <LOQ                           | -                                | 0         | <LOQ                           | -                                | 0         |
| Jun/17 (n = 2)      | <LOQ                           | -                                | 50        | <LOQ                           | -                                | 50        | <LOQ                           | -                                | 0         |
| Aug/17 (n = 4)      | <LOQ                           | -                                | 0         | <LOQ                           | -                                | 0         | <LOQ                           | -                                | 0         |
| Sep-Nov/17 (n = 18) | <LOQ-286                       | 268                              | 11        | <LOQ                           | -                                | 56        | <LOQ                           | -                                | 0         |

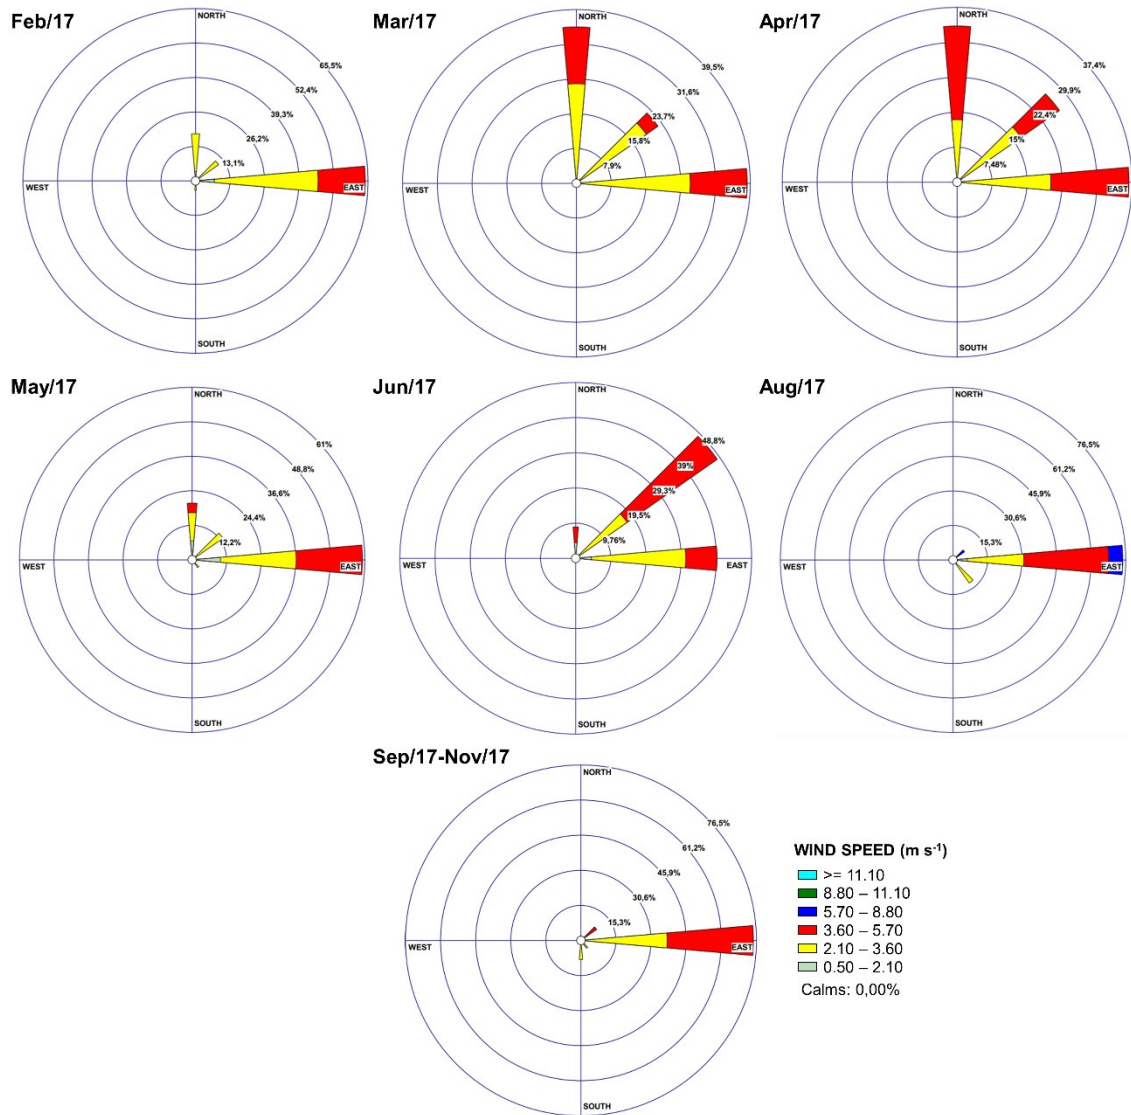

Fig. SI-1 Wind roses during gas phase sampling from February/17 to November/17 in Arapongas city (Brazil).
